# Supplementary material for: Prevalence of premature ovarian insufficiency and its determinants in Iranian populations: Tehran lipid and glucose study
Source: PubMed Central journal article supplement (PMC7903639; doi:10.1186/s12905-021-01228-1), 2021-02-23
Supplement: 12905_2021_1228_MOESM1_ESM.pdf [file 12905_2021_1228_MOESM1_ESM.pdf]

| C) Questions on personal habits:                                                                                                                                                                                       |                                                                                                                                                                   |
|------------------------------------------------------------------------------------------------------------------------------------------------------------------------------------------------------------------------|-------------------------------------------------------------------------------------------------------------------------------------------------------------------|
| <p><b>1-Do you smoke cigarettes?</b><br/>           1- Yes, regularly      2- No (go to question 3)<br/>           3- Yes, irregularly (go to question 3)</p>                                                          | <input type="checkbox"/>                                                                                                                                          |
| <p><b>2-On the average , how many cigarettes do you smoke per day ?</b><br/>           1) 1-5   2) 6-10   3) 11-15   4) 16-20   5) &gt;20<br/>           6) insufficient data<br/>           Then go to question 5</p> | <input type="checkbox"/>                                                                                                                                          |
| <p><b>3- Have you ever smoked cigarettes in the past?</b><br/>           1- Yes, regularly      2- No (go to question 6)<br/>           3- Yes, irregularly (go to question 6)</p>                                     | <input type="checkbox"/>                                                                                                                                          |
| <p><b>4- How many years have you stopped smoking?</b><br/>           (99- Don't know)</p>                                                                                                                              | <input style="width: 20px; height: 20px; border: 1px solid black;" type="text"/> <input style="width: 20px; height: 20px; border: 1px solid black;" type="text"/> |
| <p><b>5- How old were you when you first started to smoke regularly?</b> ( 99- Don't know)</p>                                                                                                                         | <input style="width: 20px; height: 20px; border: 1px solid black;" type="text"/> <input style="width: 20px; height: 20px; border: 1px solid black;" type="text"/> |
| <p><b>6- Do you smoke pipe now?</b><br/>           1- Yes, regularly      2- No (go to question 9)<br/>           3- Yes, irregularly</p>                                                                              | <input type="checkbox"/>                                                                                                                                          |
| <p><b>7- How many days does a pack of pipe tobacco last?</b><br/>           ( 99- Don't know)</p>                                                                                                                      | <input style="width: 20px; height: 20px; border: 1px solid black;" type="text"/> <input style="width: 20px; height: 20px; border: 1px solid black;" type="text"/> |

| C) Questions on personal habits:                                                                                                     |                                           |
|--------------------------------------------------------------------------------------------------------------------------------------|-------------------------------------------|
| <p><b>8- How old were you when you first started to smoke pipe?</b><br/>( 99- Don't know)</p>                                        | <input type="text"/> <input type="text"/> |
| <p><b>9- Have you ever smoked a pipe in the past?</b><br/>1- Yes, regularly      2- No<br/>3- Yes, irregularly</p>                   | <input type="checkbox"/>                  |
| <p><b>10- Do you smoke hookah (ghalian) ?</b><br/>1- Yes, regularly      2- No (go to question 13)<br/>3- Yes, irregularly</p>       | <input type="checkbox"/>                  |
| <p><b>11- How many days does a pack of tobacco last for hookah (ghalian) ?</b> ( 99- Don't know )</p>                                | <input type="text"/> <input type="text"/> |
| <p><b>12- How old were you when you first started to smoke hookah (ghalian) ?</b> ( 99- Don't know )<br/>Then go to question 14.</p> | <input type="text"/> <input type="text"/> |
| <p><b>13- Have you ever smoked hookah (ghalian) in the past?</b><br/>1- Yes, regularly      2- No      3- Yes, irregularly</p>       | <input type="checkbox"/>                  |
| <b>The following questions are asked from all age groups:</b>                                                                        |                                           |
| <p><b>14- Is there any cigarette smoker in your house that you inhale his/ her tobacco smoke?</b><br/>1- Yes      2- No</p>          | <input type="checkbox"/>                  |

*E) The following questions are asked from women only:*

|                                                                                                                                                                                                                                                                                                                                        |                                                                                                                            |
|----------------------------------------------------------------------------------------------------------------------------------------------------------------------------------------------------------------------------------------------------------------------------------------------------------------------------------------|----------------------------------------------------------------------------------------------------------------------------|
| <p><b>1-Do you have normal menstrual cycles?<br/>( for cases&gt;10years of age )</b><br/> 1-Yes, naturally without taking control pills(go to question 5)<br/> 2- No (go to question 13)<br/> 3- Prepubertal age (go to physical exam section)<br/> 4- Yes, but with hormone replacement pills</p>                                     | <input type="checkbox"/>                                                                                                   |
| <p><b>2-Are you currently taking any hormone replacement medication?</b><br/> 1- Estrogen 2- Progesterone 3-Both 4-None</p>                                                                                                                                                                                                            | <input type="checkbox"/>                                                                                                   |
| <p><b>3- For how long has your menstrual cycles stopped?<br/>(Cases &gt;15 years of ages) ( Month and year)</b></p>                                                                                                                                                                                                                    | <p><i>Year</i> <input type="text"/> <input type="text"/></p> <p><i>Month</i> <input type="text"/> <input type="text"/></p> |
| <p><b>4- What is the reason of your menstrual cycles stopping?</b><br/> 1- Natural menopause<br/> 2- Early-onset menopause<br/> 3- Hysterectomy without oophorectomy or unilateral oophorectomy<br/> 4- Hysterectomy + bilateral oophorectomy<br/> 5- Bilateral oophorectomy without hysterectomy<br/> 6- Other<br/> 7- Don't know</p> | <input type="checkbox"/>                                                                                                   |

*E) The following questions are for married women only:*

|                                                                                                                                                                                                          |                                           |
|----------------------------------------------------------------------------------------------------------------------------------------------------------------------------------------------------------|-------------------------------------------|
| <p><b>5- Which contraception method have you used during the last three months?</b><br/>         1-LD contraceptive      2-HD contraceptive<br/>         3-Minipill                4- Triphasic pill</p> | <input type="checkbox"/>                  |
| <p><b>6- Are you pregnant now?</b><br/>         1-Yes      2-No      3-Don't know</p>                                                                                                                    | <input type="checkbox"/>                  |
| <p><b>7- Have you ever been pregnant?</b><br/>         1- Yes                      2-No (go to physical exam section)</p>                                                                                | <input type="checkbox"/>                  |
| <p><b>8- How many live born children have you had?</b></p>                                                                                                                                               | <input type="text"/> <input type="text"/> |
| <p><b>9- Have you given birth to a baby in the past one year?</b><br/>         1- Yes                      2-No</p>                                                                                      | <input type="checkbox"/>                  |
| <p><b>10- Have you ever had any abortion?</b><br/>         1- Yes                      2- No (go to question 14)</p>                                                                                     | <input type="checkbox"/>                  |
| <p><b>11- How many abortions have you had?</b></p>                                                                                                                                                       | <input type="checkbox"/>                  |
| <p><b>12- Do you have any history of stillbirth?</b><br/>         1- Yes                      2- No (go to question 14)</p>                                                                              | <input type="checkbox"/>                  |

*F) The following questions are for married women only:*

|                                                                                                                                                                   |                          |
|-------------------------------------------------------------------------------------------------------------------------------------------------------------------|--------------------------|
| <b>13- How many stillbirths have you ever experienced?</b>                                                                                                        | <input type="text"/>     |
| <b>14- Has a doctor ever told you that you had hypertension or convulsion during any of your pregnancies?</b><br>1- Yes      2- No      3- Unknown                | <input type="checkbox"/> |
| <b>15- Has a doctor ever told you that you had high blood glucose or gestational diabetes during any of your pregnancies?</b><br>1-Yes      2- No      3- Unknown | <input type="checkbox"/> |
| <b>16- Have you ever had a baby that weighed 4.5 Kg or more?</b><br>1-Yes      2- No      3- Unknown                                                              | <input type="checkbox"/> |
| <b>17- Are you breast-feeding now?</b><br>1-Yes      2- No      3- Unknown                                                                                        | <input type="checkbox"/> |

*G) Physical Examination Summery:*

---

**12-Anthropometry**

- 1- Height (cm)
- 2- Weight (kg)
- 3- Waist circumference (cm)
- 4- Hip circumference (cm)
- 5- Wrist circumference (cm with one decimal digit)

---

---

---

---

---

---
